# Supplementary material for: Validation of Bengali perceived stress scale among LGBT population
Source: Springer Nature journal article supplement (doi:10.1186/s12888-017-1482-0), 2017-08-29
Supplement: MOESM1 [file 14937440]

## Perceived Stress Scale 10 Item

নির্দেশনাঃ

নিচের প্রশ্নে উল্লিখিত অনুভূতি এবং ভাবনাগুলো গত এক মাসে আপনার মধ্যে কি পরিমাণে ঘটেছে তা ডান পাশের পাঁচটির মধ্যে উপযুক্ত ঘরে টিক (X) চিহ্ন দিয়ে নির্দেশ করুন।

|    |                                                                                                                    | কখনই<br>না | অনেকাংশে<br>না | মাঝে<br>মাঝে | প্রায়শই | ঘন ঘন |
|----|--------------------------------------------------------------------------------------------------------------------|------------|----------------|--------------|----------|-------|
| ১  | গত এক মাসে অনাকাঙ্ক্ষিত কোন ঘটনার জন্য আপনি কতটুকু বিপর্যস্ত ছিলেন ?                                               | ০          | ১              | ২            | ৩        | ৪     |
| ২  | গত এক মাসে আপনি কতটুকু অনুভব করতে পেরেছিলেন যে আপনার জীবনের গুরুত্বপূর্ণ ঘটনাগুলো আপনি নিয়ন্ত্রণ করতে পারছেন না ? | ০          | ১              | ২            | ৩        | ৪     |
| ৩  | গত এক মাসে আপনি কতটুকু ঘাবড়ে যাওয়া এবং চাপ অনুভব করেছিলেন ?                                                      | ০          | ১              | ২            | ৩        | ৪     |
| ৪  | গত এক মাসে আপনার ব্যক্তিগত সমস্যাগুলো নিয়ন্ত্রণের ক্ষেত্রে আপনি কতটুকু আত্মবিশ্বাসী ছিলেন?                        | ০          | ১              | ২            | ৩        | ৪     |
| ৫  | গত এক মাসে আপনি কতটুকু অনুভব করেছিলেন যে চলমান ঘটনাগুলো আপনার অনুকূলে যাচ্ছে ?                                     | ০          | ১              | ২            | ৩        | ৪     |
| ৬  | গত এক মাসে আপনি কতটুকু অনুভব করেছিলেন যে আপনার যা করণীয় তা আপনি করতে পারেন নি ?                                   | ০          | ১              | ২            | ৩        | ৪     |
| ৭  | গত এক মাসে আপনি আপনার জীবনের বিরক্তি/ তিক্ততা কতটুকু নিয়ন্ত্রণ করতে পেরেছিলেন ?                                   | ০          | ১              | ২            | ৩        | ৪     |
| ৮  | গত এক মাসে আপনি কতটুকু অনুভব করেছিলেন যে আপনি সবকিছুর উর্ধ্বে ? (আপনার প্রাধান্য বেশি)                             | ০          | ১              | ২            | ৩        | ৪     |
| ৯  | গত এক মাসে নিয়ন্ত্রণের বাহিরে যাওয়া কোন ঘটনার জন্য আপনি কতটুকু ক্রোধান্বিত হয়েছিলেন ?                           | ০          | ১              | ২            | ৩        | ৪     |
| ১০ | গত এক মাসে আপনি কতটুকু অনুভব করেছিলেন যে জীবনের জটিলতাগুলো এতই বড় যে আপনি তা অতিক্রম করতে পারবেন না ?             | ০          | ১              | ২            | ৩        | ৪     |

Source:

This scale was translated by Professor Dr. Md. Ziaul Islam, and is available at Sheldon Cohen's Laboratory for the Study of Stress at the following web address,  
[http://www.psy.cmu.edu/~scohen/Perceived\\_Stress\\_Scale\\_Bengali\\_translation.pdf](http://www.psy.cmu.edu/~scohen/Perceived_Stress_Scale_Bengali_translation.pdf)
